# Supplementary material for: Construction of highly-stable covalent organic framework with combined enol-imine and keto-enamine linkages
Source: Royal Society of Chemistry journal article supplement (doi:10.1039/d3ra02251j), 2023-01-01
Supplement: d3ra02251j1.pdf [file d3ra02251j1.pdf]

## Construction of High-Stable Covalent Organic Framework with Combined Enol-imine and Keto-enamine Tautomeric Linkages

Jian Jiang,\* Kaiyu He, Xue Cai, Hong Yu, Minghui Zuo, Guan Yun, Tao Yun, Yue Ma,  
Zitong Zhang, Yunling Liu, Zhenlu Wang

### Support Information

| Section |                                                                            | Page No |
|---------|----------------------------------------------------------------------------|---------|
| S-1     | General Information                                                        | S2      |
| S-2     | Synthetic Procedures                                                       | S5      |
| S-3     | Structure Modeling and Atomic Coordinates of COFs                          | S9      |
| S-4     | FT-IR Spectra                                                              | S17     |
| S-5     | Morphological study of Tp-BI-COF                                           | S19     |
| S-6     | Optimization of Tp-BI-COF Synthesis Scheme                                 | S20     |
| S-7     | Gas Adsorption Studies                                                     | S22     |
| S-8     | Photochromic properties of Tp-BI-COF                                       | S23     |
| S-9     | Preparation of H <sub>3</sub> PO <sub>4</sub> @Tp-BI-COF                   | S25     |
| S-10    | Stability study of Tp-BI-COF and H <sub>3</sub> PO <sub>4</sub> @Tp-BI-COF | S26     |
| S-11    | PXRD study of Tp-BI-COF and H <sub>3</sub> PO <sub>4</sub> @Tp-BI-COF      | S29     |
| S-12    | Energy dispersive X-ray spectroscopy                                       | S30     |
| S-13    | High-resolution XPS spectra                                                | S31     |
| S-14    | Nyquist plots of H <sub>3</sub> PO <sub>4</sub> @Tp-BI-COF                 | S32     |
| S-15    | Current status of anhydrous proton conductors                              | S33     |
| S-16    | References                                                                 | S34     |

## ***Section S-1: General Information***

### **A. Materials**

Unless stated otherwise all reagents were purchased from commercial source and used without purification. Benzoyl chloride, p-phenylenediamine and pure H<sub>3</sub>PO<sub>4</sub> crystal were purchased from Shanghai Aladdin Biochemical Technology Co., Ltd. Trifluoroacetic acid, 2,4,6-trimethylbenzaldehyde, mesitylene and ultra-dry 1,4-dioxane were purchased from Beijing InnoChem Science & Technology Co., Ltd. Dichloromethane, methanol and tetrahydrofuran were purchased from Zhongtian Fine Chemical Co., Ltd. Anhydrous aluminum trichloride, hydrochloric acid, glacial acetic acid and N,N-dimethylformamide were purchased from Tianjin Damao Chemical Reagent Factory. Potassium hydroxide, sodium hydroxide, anhydrous magnesium sulfate and potassium bromide from Tianjin Bodi Chemical Co., Ltd. Hexamethylenetetramine from China Pharmaceutical (Group) Shanghai Chemical Reagent Company and phloroglucinol from Tianjin BASF Chemical Co., Ltd. 1,3,5-triformylphloroglucinol<sup>1</sup> and 1,3-dihydroxy-4,6-dibenzoylbenzen<sup>2</sup> (**Tp**) was synthesized according to literature methods. P-phenylenediamine was purified by sublimation before use.

### **B. Instruments and methods**

X-ray powder diffraction (PXRD) patterns were recorded on a Rigaku Ultima IV-185 diffractometer using Cu K $\alpha$  radiation ( $\lambda = 1.54056 \text{ \AA}$ ) over the  $2\theta$  range of  $1.8^\circ$ - $30^\circ$  and on a SAXSess mc2 diffractometer using Cu K $\alpha$  radiation ( $\lambda = 1.54056 \text{ \AA}$ ) over the  $2\theta$  range of  $0.5^\circ$ - $5^\circ$ . The Shimadzu UV-2600 UV-Vis spectrophotometer, equipped with integration sphere ISR-2200, was used to measure the UV-Vis diffuse reflectance spectrum of solid powders at room temperature. FT-IR spectra were measured on a PerkinElmer Frontier infrared spectrometer FTIR-650 ranging from  $4000$  to  $400 \text{ cm}^{-1}$ . The thermogravimetric analysis was performed on a Netzsch TG 209 F1 Libra thermogravimetric analyzer with a ramp rate of  $10 \text{ K/min}$  and a temperature of  $35$  to  $800 \text{ }^\circ\text{C}$  under the atmosphere of nitrogen. Elemental analysis (C, H, O and N) was

performed on a PerkinElmer 2400chn elemental analyzer. SEM images were obtained using a JSM-6480LV at 5.0 kV. FEI (Jeol FEG 2100F) high resolution transmission electron microscope (HRTEM) equipped with field emission source operating at 300 kV was used to record TEM images. The nitrogen adsorption and desorption isotherms were measured at 77 K using an Autosorb-iQ (Quantachrome) surface area size analyzer. Before measurement, the samples were degassed in vacuum at 100 °C for 10 h. The Brunauer-Emmett-Teller (BET) method was utilized to calculate the specific surface area.  $^1\text{H}$  and  $^{13}\text{C}$ NMR spectrum were measured on a Bruker Fourier 400 MHz spectrometer. Solid state cross polarization magic angle spinning (CP/MAS) NMR was taken on an AVIII 500 MHz solid-state NMR spectrometer. Mass spectra were obtained on the Solarix XR-15T FTMS Mass Spectrometry Facility. X-ray photoelectron spectroscopy (XPS) was measured on the Thermo ESCALAB 250XI instrument and the C 1s line at 284.8 eV was used as the binding energy reference.

**Impedance Measurements.** The pellet was sandwiched between two stainless steel electrodes under nitrogen. The proton conductivity was characterized by alternating current impedance spectroscopy using a CHI 600E instrument over frequency range 1 Hz to 1 MHz with input amplitude voltage of 100 mV under nitrogen. To estimate the activation energy ( $Ea$ ) of the solid electrolyte, the conductivity was measured at various temperatures from 100 to 160 °C. The conductivity was calculated using the equation of  $\sigma = L/SR_s$  where  $\sigma$  is the conductivity ( $\text{S cm}^{-1}$ ), and  $S$  is the electrode area ( $\text{cm}^2$ ),  $L$  is the sample pellets thickness (cm), and  $R_s$  is the bulk resistance of the sample ( $\Omega$ ). The activation energy ( $Ea$ ) for the material conductivity was estimated from the equation of  $\sigma = \sigma_0 e^{-Ea/k_B T}$ , where  $\sigma_0$  is the pre-exponential factor,  $k_B$  is the Boltzmann constant, and  $T$  is the sample temperature.

### Calculation of maximum loading content of H<sub>3</sub>PO<sub>4</sub>.

The maximum loading content of H<sub>3</sub>PO<sub>4</sub> in **H<sub>3</sub>PO<sub>4</sub>@Tp-BI-COF** is calculated as formula below:

$$\text{Maximum loading content} = \frac{d \cdot V}{d \cdot V + 1}$$

*d*: density of H<sub>3</sub>PO<sub>4</sub> (g cm<sup>-3</sup>)

*V*: pore volume of COF (cm<sup>3</sup> g<sup>-1</sup>)

## Section S-2: Synthetic procedures

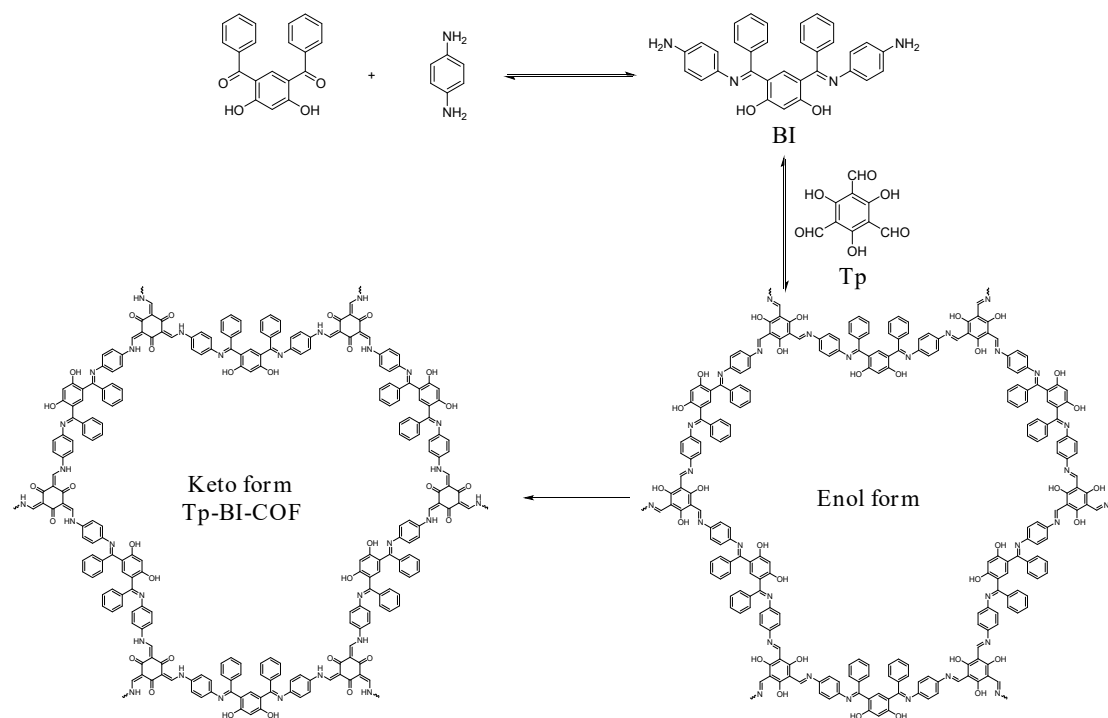

**Figure S1:** Schematic representation of the synthesis of **Tp-BI-COF**.

**Synthesis of 4,6-bis((E)-((4-aminophenyl)imino)(phenyl)methyl)benzene-1,3-diol (BI):** A mixture of 1,3-Dihydroxy-4,6-dibenzoylphenone (1.304 g, 4.1 mmol) and p-phenylenediamine (0.864 g, 8 mmol) was heated by heat gun (around 180 °C) in Schlenk tube under N<sub>2</sub>. The mixed solid turned to dark red liquid, and then the liquid became dry and red solid was obtained. Stop heating, and the crude product was sonicated in 10 ml methanol. After filtration, the solid was dried under vacuum at 60 °C to obtain 1.76 g (88.4 %) of red powder.

**Data of 4,6-bis((E)-((4-aminophenyl)imino)(phenyl)methyl)benzene-1,3-diol (BI):** <sup>1</sup>H NMR (400 MHz, DMSO-*d*<sub>6</sub>): δ (ppm) 10.30 (s, 2H), 7.22-7.03 (m, 10H), 6.62 (s, 1H), 6.47-6.30 (m, 8H), 6.28 (s, 1H), 5.06 (s, 4H). <sup>13</sup>C NMR (100 MHz, DMSO-*d*<sub>6</sub>): δ (ppm) 169.36, 168.89, 147.02, 142.2, 137.82, 133.80, 133.37, 129.07, 128.72, 128.70, 124.64, 114.11, 112.62, 104.69. MALDI-FTICR MS (dithranol matrix) *m/z* = 499.3

(M+H)<sup>+</sup>. Anal. Calc'd for C<sub>32</sub>H<sub>26</sub>N<sub>4</sub>O<sub>2</sub>: C (77.09 %), H (5.26 %), N (11.24 %); Found: C (77.32 %), H (5.12%), N (11.26 %). MP = dec. at 298 °C.

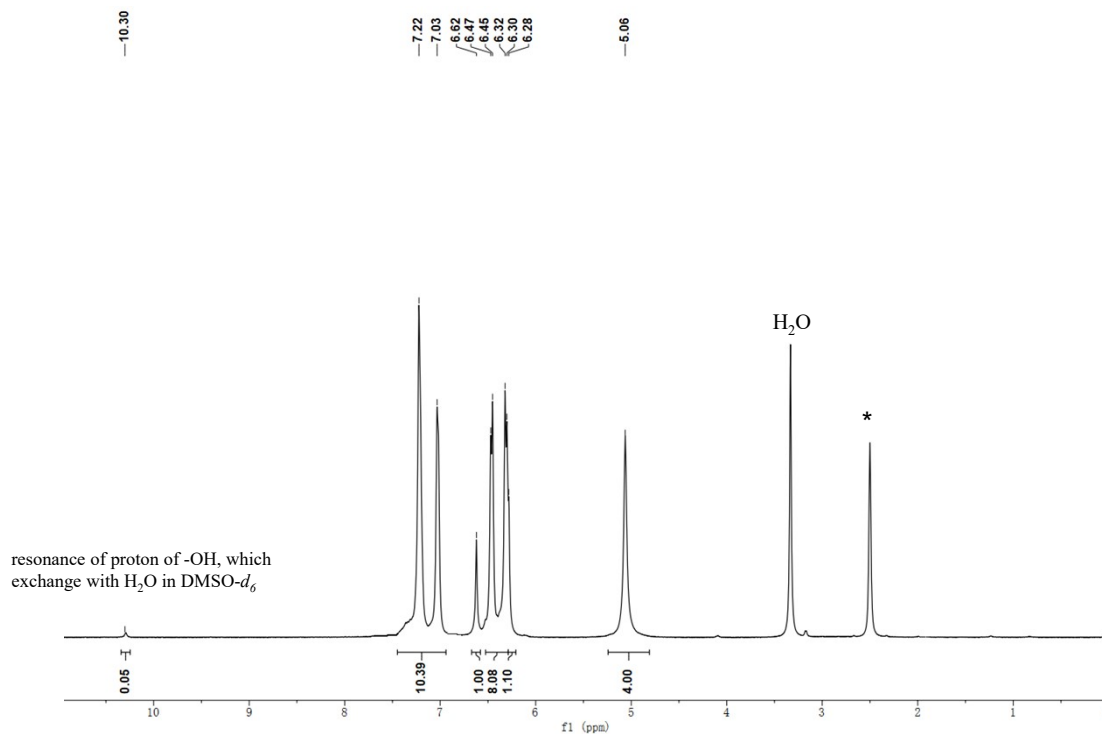

<sup>1</sup>H NMR spectrum of **BI** in DMSO-*d*<sub>6</sub>.

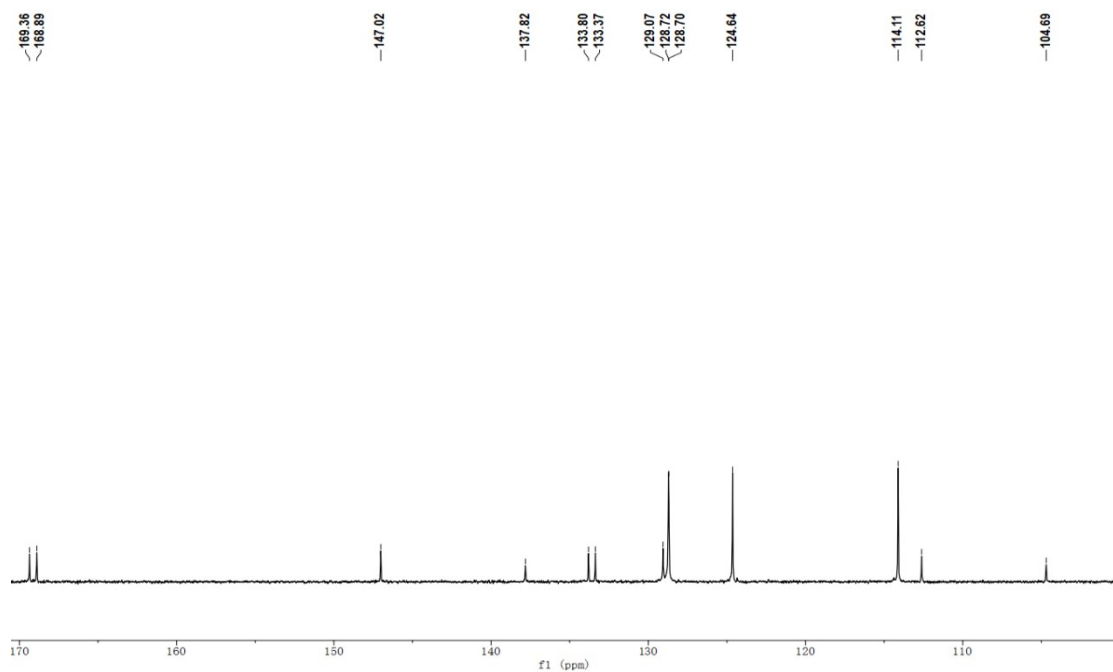

<sup>13</sup>C NMR spectrum of **BI** in DMSO-*d*<sub>6</sub>.

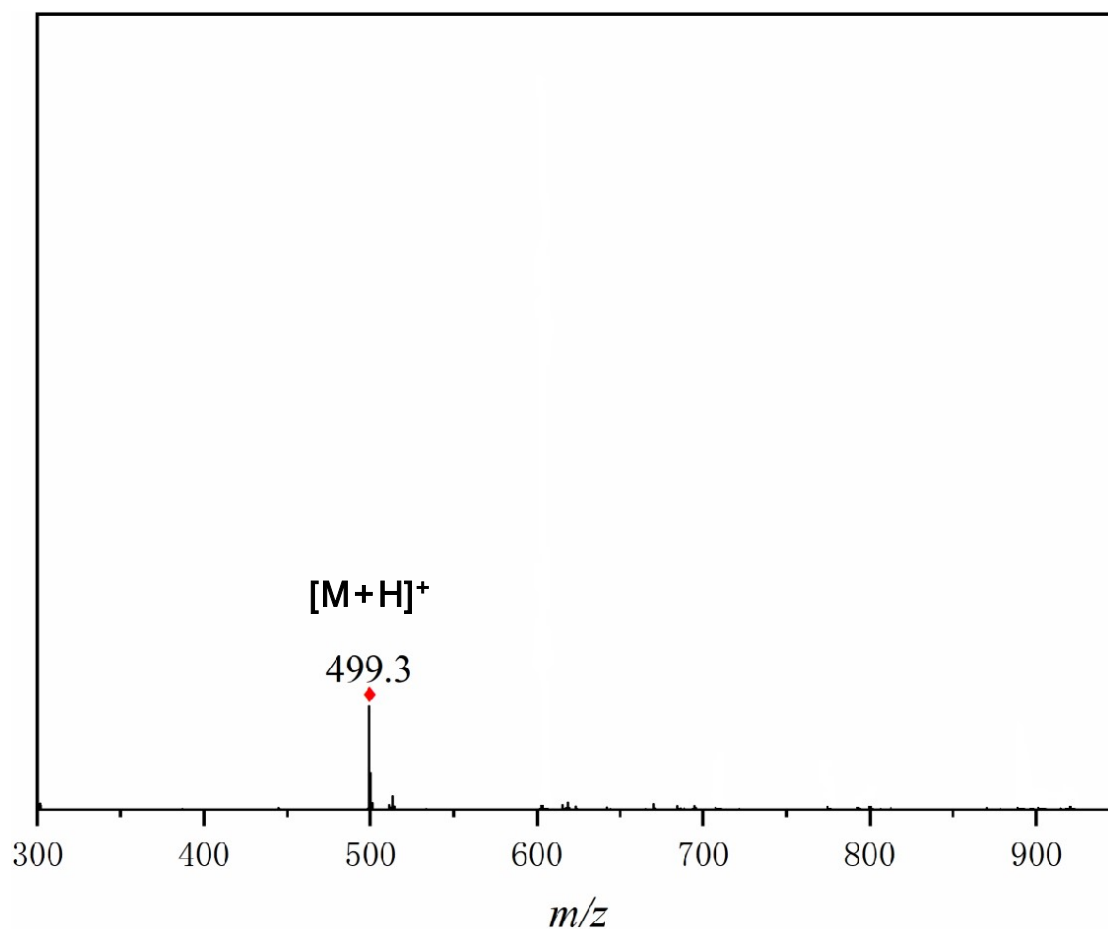

MALDI-FTICR MS spectrum of **BI**.

**Synthesis of Tp-BI-COF:** A hydrothermal synthesis reactor (20 ml) is charged with **Tp** (17.8 mg, 0.086 mmol), **BI** (64 mg, 0.129 mmol), 2 mL of mesitylene, 2 ml of dioxane, 0.4 ml of 3 M aqueous acetic acid. This mixture was sonicated for 30 minutes in order to get a homogenous dispersion. The reactor was sealed off and then heated at 120 °C for 3 days. Red precipitation formed was collected by centrifugation and washed with anhydrous tetrahydrofuran and acetone. The powder collected was then dried at 180 °C under vacuum for 24 hours to give 32.44 mg dark red powder in 42.04 % isolated yield.

**Data for Tp-BI-COF:** Elemental analysis: Calcd: C (75.82 %), H (4.24 %), N (9.31 %); Found: C (67.68 %), H (5.267 %), N (9.40 %). The elemental analysis is often reported to be different from the expected values as a result of incomplete combustion, as has also been found in other reports of carbon-rich porous materials.<sup>3</sup> Solid-state <sup>13</sup>C

NMR  $\delta$  (ppm): 186.55, 184.02, 146.44, 135.36, 129.64, 120.63, 114.68, 106.72.

**Preparation of  $\text{H}_3\text{PO}_4@\text{Tp-BI-COF}$ :**  $\text{H}_3\text{PO}_4@\text{Tp-BI-COF}$  was prepared according to a reported method.<sup>4</sup> Homogeneous solution of phosphoric acid crystal (148.63 mg) dissolved in anhydrous THF (2 mL) was injected into the **Tp-BI-COF** sample (50 mg) in a vial (20 mL) which was preheated under vacuum at 120 °C overnight to yield a solution which was stirred at room temperature for 3 h under  $\text{N}_2$ . The system was slowly evaporated under vacuum to remove THF at 70 °C over a period of 6 h. The vial was then kept in an oven at 70 °C under  $\text{N}_2$  for 12 h. The resulting powder was collected to yield  $\text{H}_3\text{PO}_4@\text{Tp-BI-COF}$  quantitatively.

#### **Stability test and COF sample recovery methods.**

**Stability test:** The COF samples (100 mg) were dispersed in different solvents including water (100 °C), THF,  $\text{CH}_2\text{Cl}_2$ , aqueous HCl (9 M), and neat  $\text{H}_3\text{PO}_4$  (9 M, a THF solution of  $\text{H}_3\text{PO}_4$ ), and stirred for one week. Stability in base circumstance was tested in aqueous NaOH solution by dispersing COF sample (100 mg) into aqueous NaOH (9 M) and stirring for one or two days.

**Sample recovery methods:** The COF samples in boiling water, THF, and  $\text{CH}_2\text{Cl}_2$  were collected by filtration and dried at 120 °C under vacuum for 12 h. The COF samples in THF solution of  $\text{H}_3\text{PO}_4$  was washed with  $\text{CH}_3\text{OH}$  ( $2 \times 10$  mL) and water ( $10 \times 10$  mL), neutralized with triethylamine/acetone solution (5 %,  $1 \times 10$  mL), washed again with water ( $5 \times 10$  mL) and dried under vacuum at 120 °C for 12 h. The COF sample in the aqueous HCl solution was washed with water ( $5 \times 10$  mL), neutralized with triethylamine/acetone solution (5 %,  $1 \times 10$  mL), washed again with water ( $5 \times 10$  mL), and dried under vacuum at 120 °C for 12 h. COF sample in aqueous NaOH solution was washed with water ( $20 \times 10$  ml) and dried under vacuum at 120 °C for 12 h. These samples were then used for PXRD and porosity measurements.



### Section S-3: Structure Modeling and Atomic Coordinates of COF

The geometry of compound **BI** was optimized with Materials Studio suite of programs to determine the conformations. Simulation was started from likely conformation and minimized using universal force-field in the forcite module.

The **Tp-BI-COF** models were simulated using Materials Studio suite of programs. Firstly, the eclipsed model was built and the symmetry of lattice was degraded to *P1*. Then the lattice and geometry model were optimized using universal force-field in the forcite module. The staggered arrangement for **Tp-BI-COF** was also examined by offsetting the alternating stacked units from the eclipsed model.

Pawley refinement was carried out using Reflex module, a software package for crystal determination from PXRD pattern. Unit cell dimension was set to the theoretical parameters. The Pawley refinement was performed to optimize the lattice parameters iteratively until the Rwp value converges and overlay of the observed with refined profiles show good agreement.

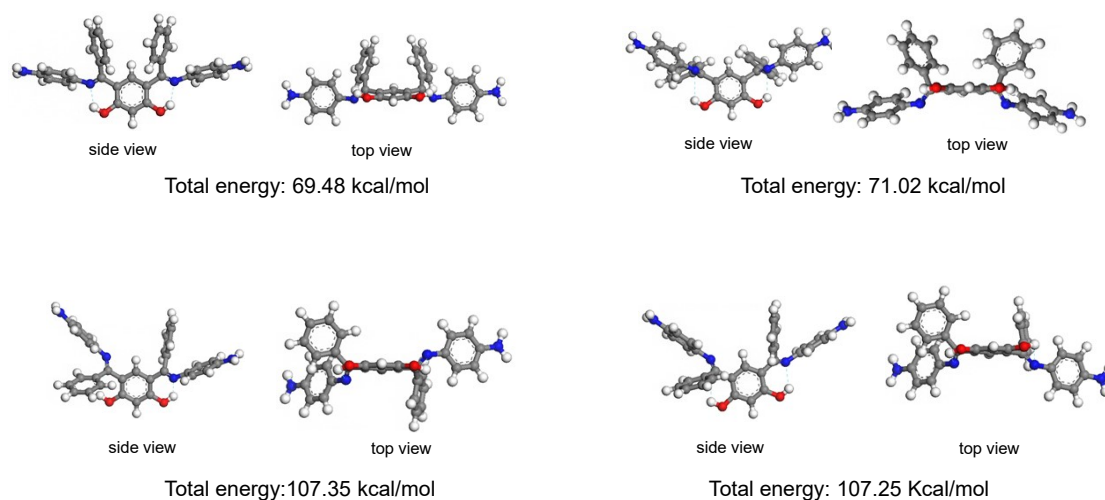

**Figure S2:** Energy-minimized structure of **BI**. Atom key: N (blue), C (gray), H(white), O (red). From the simulation, several conformations with similar energy were obtained. There may well be additional conformation, but these are representative. What they clearly show is that the compound appears flexible and does not have a flat conformation.

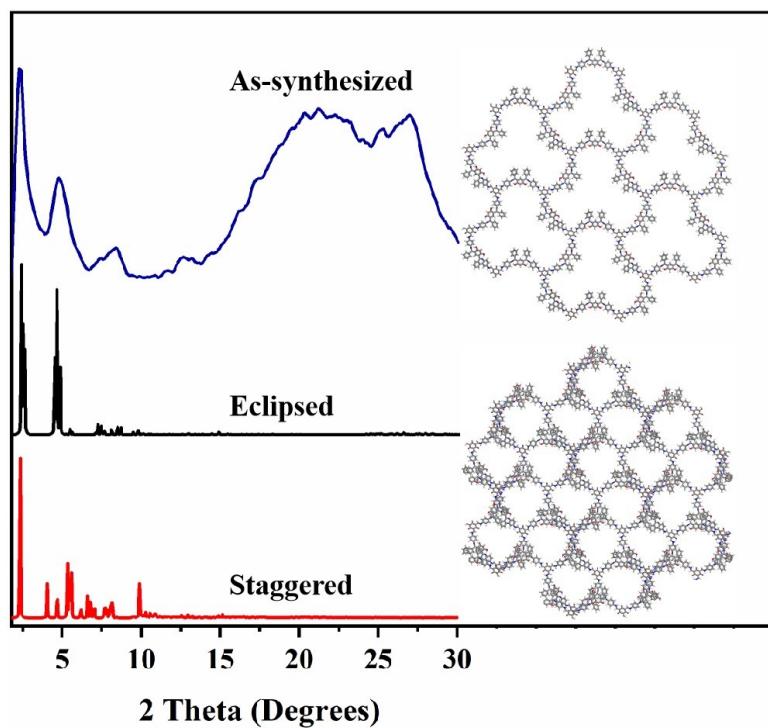

**Figure S3:** PXRD patterns of **Tp-BI-COF**: experimental pattern (blue), simulated patterns with the eclipsed (black) and staggered (red) stacking models.

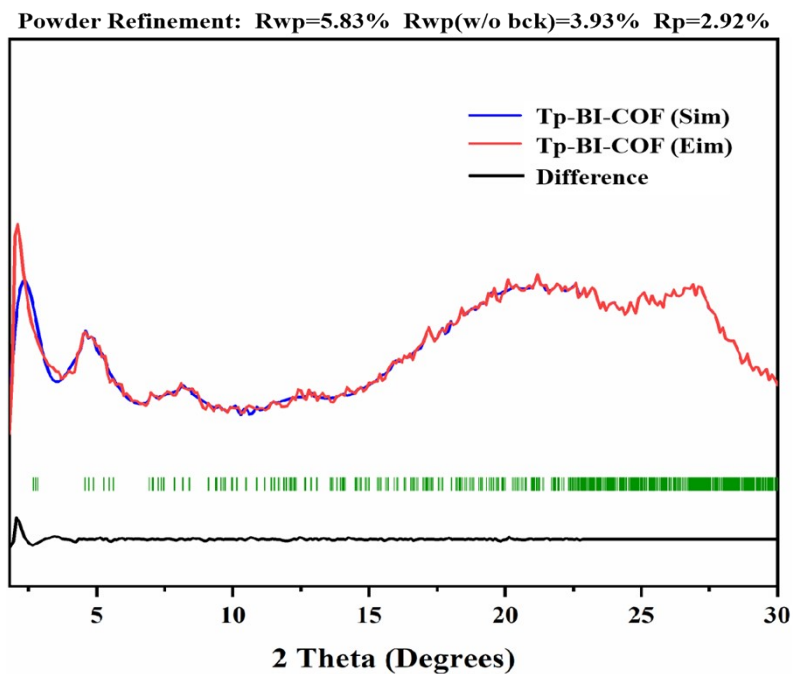

**Figure S4:** PXRD profiles of **Tp-BI-COF** experimental observed (red), Pawley refinement (blue) and their difference (black).

| Change in unit cell parameters of Tp-BI-COF                                          |                                                                                        |
|--------------------------------------------------------------------------------------|----------------------------------------------------------------------------------------|
| Before                                                                               | After refinement                                                                       |
| Space group: P1(C1-1)                                                                | Space group: P1(C1-1)                                                                  |
| $a = 39.0585 \text{ \AA}$ , $b = 37.5546 \text{ \AA}$ ,<br>$c = 3.96141 \text{ \AA}$ | $a = 38.13004 \text{ \AA}$ , $b = 37.63950 \text{ \AA}$ ,<br>$c = 4.25724 \text{ \AA}$ |
| $\alpha = 103.110$ , $\beta = 92.6854$ ,<br>$\gamma = 118.231$                       | $\alpha = 103.097$ , $\beta = 92.2914$ ,<br>$\gamma = 118.257$                         |

**Table S1.** Fractional atomic coordinates for the unit cell of Tp-BI-COF

| Tp-BI-COF                                                                           |        |        |        |
|-------------------------------------------------------------------------------------|--------|--------|--------|
| Triclinic P1(C1-1)                                                                  |        |        |        |
| $a = 38.13004 \text{ \AA}$ , $b = 37.63950 \text{ \AA}$ , $c = 4.25724 \text{ \AA}$ |        |        |        |
| Atom                                                                                | x/a    | y/b    | z/c    |
| H                                                                                   | 18.528 | 15.454 | -1.392 |
| H                                                                                   | 14.431 | 10.613 | -0.12  |
| C                                                                                   | 22.345 | 23.066 | 2.135  |
| C                                                                                   | 21.586 | 24.23  | 2.168  |
| C                                                                                   | 20.492 | 24.377 | 1.315  |
| C                                                                                   | 20.174 | 23.345 | 0.43   |
| C                                                                                   | 20.956 | 22.197 | 0.39   |
| C                                                                                   | 22.078 | 22.021 | 1.229  |
| O                                                                                   | 24.167 | 18.253 | 1.968  |
| C                                                                                   | 24.833 | 19.454 | 1.98   |
| C                                                                                   | 26.16  | 19.386 | 2.363  |
| C                                                                                   | 26.957 | 20.512 | 2.455  |
| C                                                                                   | 26.42  | 21.778 | 2.162  |
| C                                                                                   | 25.086 | 21.809 | 1.745  |
| C                                                                                   | 24.246 | 20.694 | 1.65   |
| C                                                                                   | 22.856 | 20.782 | 1.184  |
| N                                                                                   | 22.271 | 19.73  | 0.697  |
| C                                                                                   | 21.654 | 16.382 | -0.803 |
| C                                                                                   | 22.312 | 17.504 | -0.309 |
| C                                                                                   | 21.608 | 18.614 | 0.172  |
| C                                                                                   | 20.211 | 18.58  | 0.107  |

---

|   |        |        |        |
|---|--------|--------|--------|
| C | 19.537 | 17.479 | -0.404 |
| C | 20.246 | 16.345 | -0.847 |
| N | 20.141 | 9.068  | 0.829  |
| N | 19.511 | 15.237 | -1.318 |
| O | 16.233 | 9.928  | 0.168  |
| C | 18.836 | 9.37   | 0.547  |
| O | 20.623 | 11.557 | 0.037  |
| C | 19.867 | 13.99  | -0.87  |
| O | 17.054 | 14.308 | -1.24  |
| C | 17.006 | 10.841 | -0.076 |
| C | 18.448 | 10.61  | 0.115  |
| C | 19.423 | 11.705 | -0.144 |
| C | 18.94  | 13.01  | -0.631 |
| C | 17.486 | 13.24  | -0.832 |
| C | 16.526 | 12.166 | -0.528 |
| C | 15.195 | 12.452 | -0.658 |
| N | 14.194 | 11.562 | -0.366 |
| C | 10.883 | 11.464 | 1.35   |
| C | 12.04  | 11.099 | 0.627  |
| C | 13.046 | 12.02  | 0.34   |
| C | 12.901 | 13.352 | 0.793  |
| C | 11.779 | 13.735 | 1.523  |
| C | 10.809 | 12.803 | 1.797  |
| C | 7.67   | 10.087 | 2.824  |
| C | 7.742  | 8.764  | 2.409  |
| C | 8.812  | 8.33   | 1.626  |
| C | 9.809  | 9.211  | 1.272  |
| C | 9.776  | 10.567 | 1.673  |
| C | 2.045  | 11.582 | 3.303  |
| C | 1.583  | 10.279 | 3.157  |
| C | 2.377  | 9.206  | 3.565  |
| C | 3.631  | 9.456  | 4.124  |
| C | 4.082  | 10.763 | 4.264  |
| C | 3.312  | 11.87  | 3.851  |
| N | 9.649  | 12.974 | 2.488  |
| C | 8.626  | 11.024 | 2.456  |
| C | 8.58   | 12.424 | 2.89   |
| O | 9.186  | 14.784 | 4.483  |
| O | 4.723  | 15.441 | 5.695  |
| C | 6.203  | 12.835 | 3.568  |
| C | 7.557  | 13.163 | 3.62   |
| C | 7.902  | 14.306 | 4.368  |

---

---

|   |        |        |        |
|---|--------|--------|--------|
| C | 6.928  | 15.01  | 5.051  |
| C | 5.592  | 14.661 | 4.975  |
| C | 5.19   | 13.558 | 4.199  |
| C | 3.775  | 13.248 | 4.002  |
| N | 2.939  | 14.235 | 3.876  |
| C | -0.087 | 16.333 | 3.29   |
| C | 0.716  | 15.219 | 3.515  |
| C | 2.09   | 15.345 | 3.747  |
| C | 2.616  | 16.638 | 3.802  |
| C | 1.832  | 17.763 | 3.578  |
| C | 0.46   | 17.633 | 3.281  |
| C | 21.671 | -0.856 | 1.267  |
| C | 22.417 | 0.305  | 1.524  |
| C | 21.898 | 1.539  | 1.936  |
| C | 20.505 | 1.591  | 2.114  |
| C | 19.739 | 0.458  | 1.925  |
| C | 20.289 | -0.746 | 1.531  |
| O | 19.821 | 2.708  | 2.516  |
| C | 22.726 | 2.736  | 2.138  |
| N | 22.21  | 3.914  | 1.932  |
| C | 21.663 | 5.191  | 1.712  |
| C | 22.389 | 6.357  | 1.982  |
| C | 21.876 | 7.618  | 1.701  |
| C | 20.589 | 7.769  | 1.146  |
| C | 19.839 | 6.6    | 0.909  |
| C | 20.374 | 5.348  | 1.19   |
| C | 24.137 | 2.653  | 2.523  |
| C | 25.01  | 3.745  | 2.33   |
| C | 26.355 | 3.692  | 2.682  |
| C | 26.886 | 2.528  | 3.238  |
| C | 26.046 | 1.438  | 3.467  |
| C | 24.699 | 1.515  | 3.136  |
| C | 4.488  | 30.948 | 0.812  |
| C | 5.853  | 30.843 | 0.279  |
| N | 3.804  | 29.842 | 0.9    |
| C | 6.549  | 29.614 | 0.3    |
| C | 7.851  | 29.484 | -0.17  |
| C | 8.518  | 30.59  | -0.696 |
| C | 7.843  | 31.807 | -0.787 |
| C | 6.534  | 31.914 | -0.332 |
| C | 3.113  | 28.62  | 0.991  |
| C | 1.789  | 28.485 | 0.552  |

---

---

|   |         |        |       |
|---|---------|--------|-------|
| C | 1.102   | 27.278 | 0.644 |
| C | 1.733   | 26.131 | 1.165 |
| C | 3.074   | 26.256 | 1.58  |
| C | 3.735   | 27.475 | 1.501 |
| N | 1.115   | 24.871 | 1.309 |
| C | -0.218  | 24.63  | 1.103 |
| C | -0.785  | 23.408 | 1.352 |
| C | -2.228  | 23.256 | 1.102 |
| C | -2.898  | 21.957 | 1.377 |
| C | -2.121  | 20.819 | 1.903 |
| C | -0.665  | 20.976 | 2.146 |
| C | 0.004   | 22.258 | 1.856 |
| O | -2.835  | 24.22  | 0.661 |
| C | -4.238  | 21.777 | 1.168 |
| O | -2.695  | 19.766 | 2.135 |
| C | 0.11    | 19.964 | 2.642 |
| O | 1.208   | 22.34  | 2.043 |
| N | -0.382  | 18.724 | 2.97  |
| N | -5.044  | 22.781 | 0.693 |
| C | -6.417  | 22.77  | 1.013 |
| C | -7.022  | 23.968 | 1.44  |
| C | -8.371  | 24.001 | 1.769 |
| C | -9.181  | 22.866 | 1.652 |
| C | -8.58   | 21.684 | 1.207 |
| C | -7.224  | 21.621 | 0.902 |
| N | -10.552 | 22.919 | 1.945 |
| C | -11.82  | 22.972 | 2.217 |
| C | -12.417 | 24.252 | 2.591 |
| C | -11.794 | 25.475 | 2.267 |
| C | -12.34  | 26.699 | 2.636 |
| C | -13.542 | 26.745 | 3.344 |
| C | -14.174 | 25.551 | 3.697 |
| C | -13.609 | 24.333 | 3.339 |
| H | 20.478  | 3.397  | 2.604 |
| H | 30.968  | 47.465 | 3.799 |
| H | 25.129  | 48.199 | 5.53  |
| H | 23.005  | 57.239 | 1.659 |
| H | 19.936  | 51.579 | 2.816 |
| H | 44.539  | 51.557 | 1.771 |
| O | 10.468  | 53.379 | 2.863 |
| H | 10.863  | 54.244 | 2.956 |
| O | 40.674  | 31.319 | 1.442 |

---

---

|   |        |        |        |
|---|--------|--------|--------|
| H | 41.2   | 30.526 | 1.38   |
| H | 16.615 | 56.81  | 0.635  |
| H | 42.136 | 42.873 | 0.839  |
| H | 23.132 | 22.971 | 2.89   |
| H | 21.829 | 25.022 | 2.891  |
| H | 19.883 | 25.29  | 1.343  |
| H | 19.318 | 23.45  | -0.252 |
| H | 20.679 | 21.428 | -0.345 |
| H | 26.592 | 18.408 | 2.613  |
| H | 24.694 | 22.781 | 1.415  |
| H | 22.241 | 15.531 | -1.185 |
| H | 23.413 | 17.518 | -0.3   |
| H | 19.619 | 19.43  | 0.472  |
| H | 18.434 | 17.473 | -0.433 |
| H | 18.105 | 8.575  | 0.715  |
| H | 20.933 | 13.817 | -0.704 |
| H | 14.861 | 13.435 | -0.997 |
| H | 12.177 | 10.07  | 0.259  |
| H | 13.682 | 14.104 | 0.604  |
| H | 11.67  | 14.772 | 1.869  |
| H | 6.834  | 10.337 | 3.485  |
| H | 6.965  | 8.051  | 2.719  |
| H | 8.867  | 7.278  | 1.307  |
| H | 10.644 | 8.819  | 0.676  |
| H | 1.391  | 12.389 | 2.948  |
| H | 0.594  | 10.094 | 2.713  |
| H | 2.015  | 8.174  | 3.456  |
| H | 4.257  | 8.62   | 4.467  |
| H | 5.062  | 10.896 | 4.734  |
| H | 5.899  | 12.014 | 2.909  |
| H | 7.221  | 15.882 | 5.651  |
| H | -1.164 | 16.202 | 3.09   |
| H | 0.245  | 14.228 | 3.478  |
| H | 3.692  | 16.786 | 3.988  |
| H | 2.319  | 18.748 | 3.641  |
| H | 23.503 | 0.259  | 1.397  |
| H | 18.656 | 0.515  | 2.102  |
| H | 23.395 | 6.301  | 2.417  |
| H | 22.472 | 8.518  | 1.924  |
| H | 18.837 | 6.653  | 0.457  |
| H | 19.76  | 4.464  | 0.959  |
| H | 24.658 | 4.666  | 1.85   |

---

---

|   |         |        |        |
|---|---------|--------|--------|
| H | 27.003  | 4.561  | 2.499  |
| H | 27.949  | 2.477  | 3.512  |
| H | 26.443  | 0.531  | 3.947  |
| H | 24.075  | 0.659  | 3.407  |
| H | 6.091   | 28.715 | 0.729  |
| H | 8.36    | 28.511 | -0.11  |
| H | 9.547   | 30.496 | -1.067 |
| H | 8.335   | 32.672 | -1.255 |
| H | 6.031   | 32.868 | -0.509 |
| H | 1.261   | 29.339 | 0.103  |
| H | 0.067   | 27.238 | 0.273  |
| H | 3.595   | 25.378 | 1.997  |
| H | 4.767   | 27.52  | 1.872  |
| H | -0.817  | 25.465 | 0.735  |
| H | -4.725  | 20.824 | 1.39   |
| H | 1.179   | 20.124 | 2.798  |
| H | -6.408  | 24.879 | 1.537  |
| H | -8.791  | 24.954 | 2.117  |
| H | -9.195  | 20.781 | 1.071  |
| H | -6.791  | 20.678 | 0.533  |
| H | -10.867 | 25.493 | 1.68   |
| H | -11.834 | 27.632 | 2.35   |
| H | -13.98  | 27.71  | 3.633  |
| H | -15.103 | 25.572 | 4.285  |
| H | -14.106 | 23.427 | 3.706  |

---



### Section S-4: FT-IR Spectra

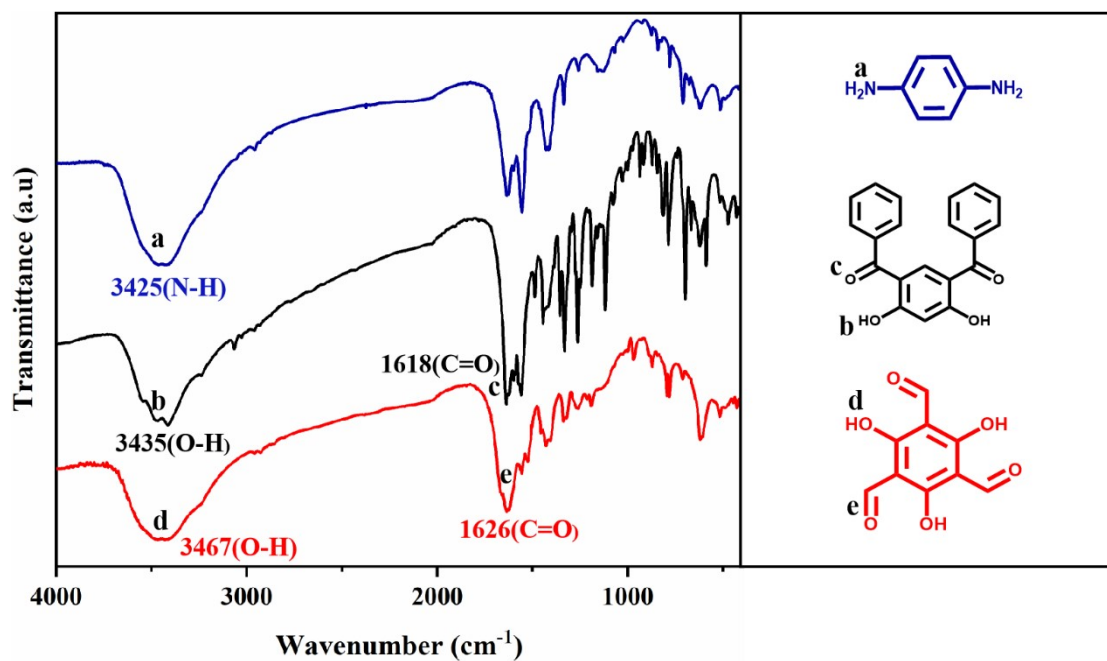

**Figure S5:** FT-IR spectra of p-phenylenediamine (blue), 1,3-dihydroxy-4,6-dibenzoylbenzen (black), and triformylphloroglucinol (red).

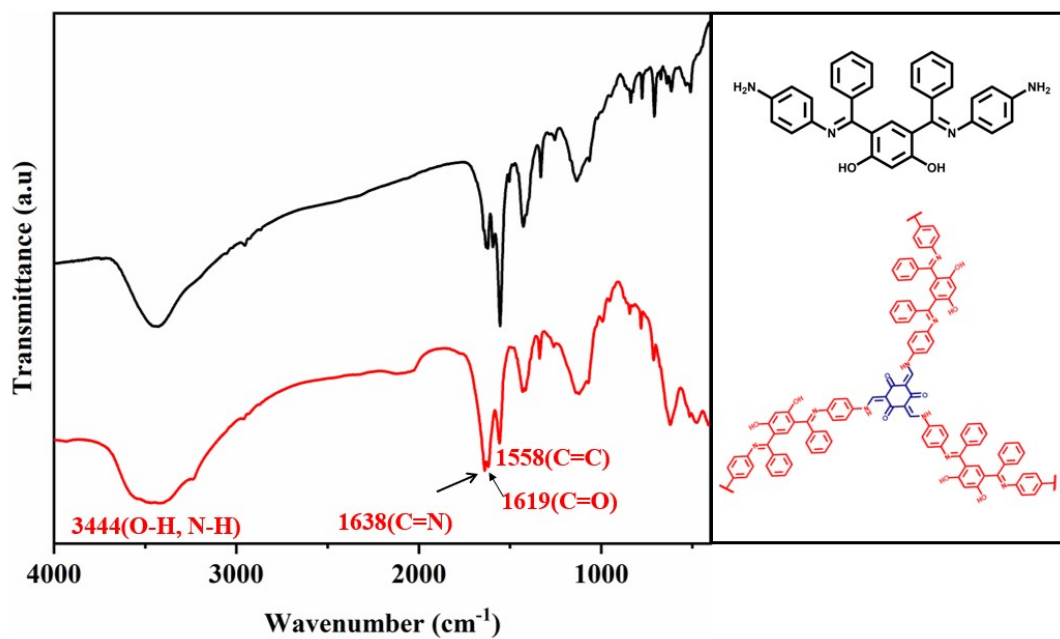

**Figure S6:** FT-IR spectra of BI (black) and Tp-BI-COF (red).

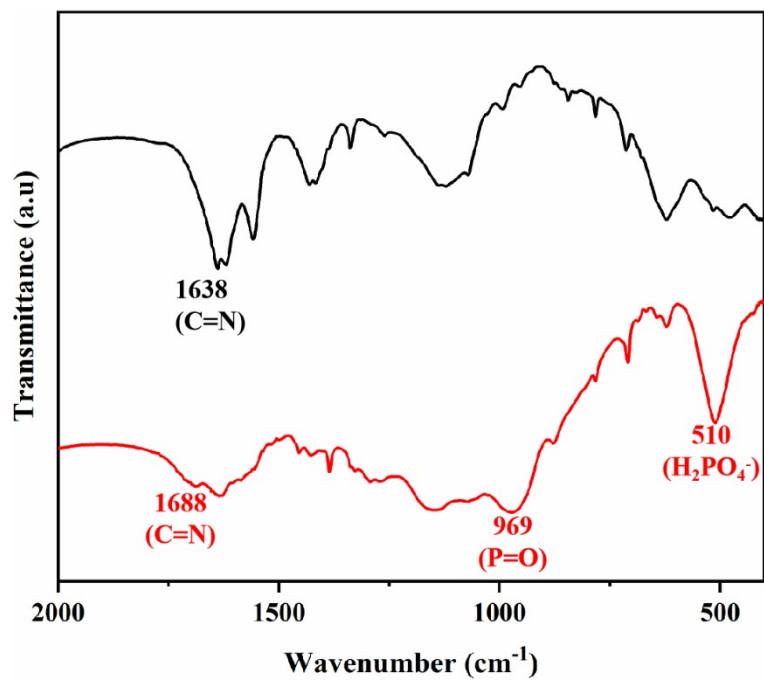

**Figure S7:** FT-IR spectra of **Tp-BI-COF** (black) and **H<sub>3</sub>PO<sub>4</sub>@Tp-BI-COF** (red).

**Section S-5: Morphological study of Tp-BI-COF**

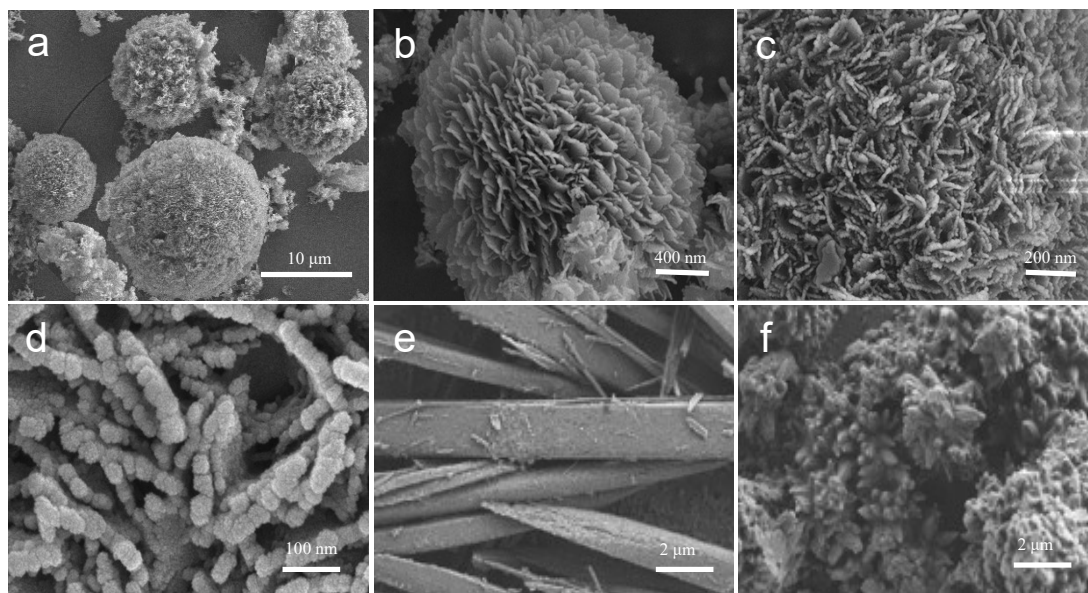

**Figure S8:** (a-d) SEM images of **Tp-BI-COF**, (e) SEM images of starting material **BI**, (f) SEM images of starting material **Tp**.

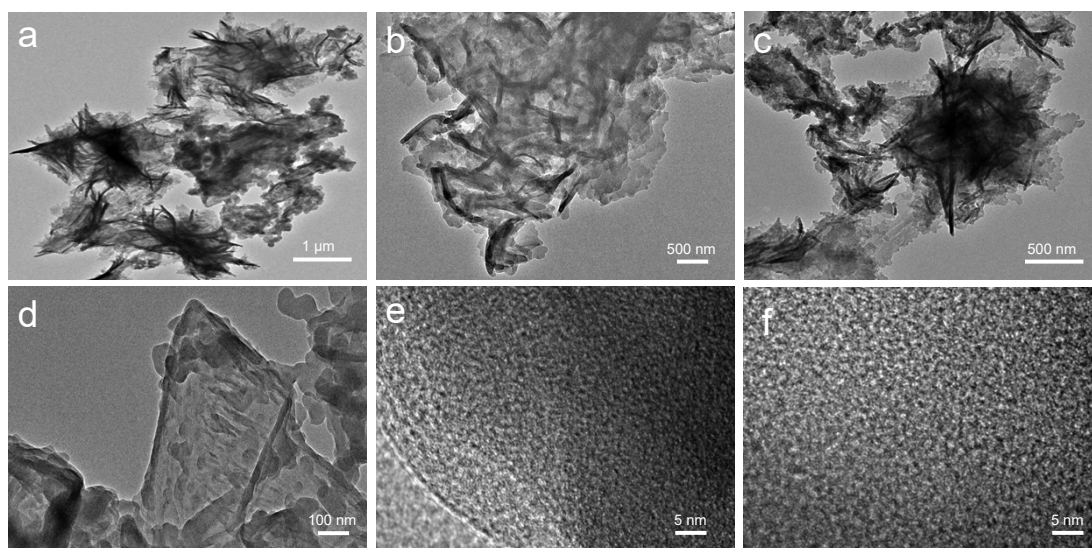

**Figure S9:** (a-f) HRTEM images of **Tp-BI-COF**.

### ***Section S-6: Optimization of Tp-BI-COF Synthesis Scheme***

**Table S2.** BET surface area of **Tp-BI-COF** synthesized by different experimental schemes.

| serial number | solvent system (4 mL)                                              | TEMP (°C) | HOAc (0.4 mL) | BET (m <sup>2</sup> g <sup>-1</sup> ) |
|---------------|--------------------------------------------------------------------|-----------|---------------|---------------------------------------|
| 1             | DMF                                                                | 120       | 3 M           | 38.52                                 |
| 2             | DMF: Mesitylene = 1: 1                                             | 120       | 3 M           | 53.43                                 |
| 3             | DMF: 1,4-dioxane = 1: 1                                            | 120       | 3 M           | 34.12                                 |
| 4             | 1,4-dioxane: Mesitylene: 2,4,6-Trimethoxybenzaldehyde = 1: 1: 0.25 | 120       | 3 M           | 39.58                                 |
| 5             | 1,4-dioxane: Mesitylene = 5: 1                                     | 120       | 3 M           | 462.34                                |
| 6             | 1,4-dioxane: Mesitylene = 3: 1                                     | 120       | 3 M           | 561.23                                |
| 7             | 1,4-dioxane: Mesitylene = 1: 1                                     | 120       | 3 M           | 1018                                  |
| 8             | 1,4-dioxane: Mesitylene = 1: 3                                     | 120       | 3 M           | 752.86                                |
| 9             | 1,4-dioxane: Mesitylene = 1: 5                                     | 120       | 3 M           | 698.12                                |
| 10            | 1,4-dioxane: Mesitylene = 1: 7                                     | 120       | 3 M           | 489.67                                |
| 11            | 1,4-dioxane: Mesitylene = 1: 9                                     | 120       | 3 M           | 539.83                                |
| 12            | 1,4-dioxane: Mesitylene = 1: 1                                     | 120       | 1 M           | 110.57                                |
| 13            | 1,4-dioxane: Mesitylene = 1: 1                                     | 120       | 2 M           | 980.71                                |
| 14            | 1,4-dioxane: Mesitylene = 1: 1                                     | 120       | 5 M           | 982.48                                |
| 15            | 1,4-dioxane: Mesitylene = 1: 1                                     | 120       | 6 M           | 982.67                                |
| 16            | 1,4-dioxane: Mesitylene = 1: 1                                     | 90        | 3 M           | 576.32                                |
| 17            | 1,4-dioxane: Mesitylene = 1: 1                                     | 100       | 3 M           | 612.94                                |
| 18            | 1,4-dioxane: Mesitylene = 1: 1                                     | 110       | 3 M           | 783.68                                |
| 19            | 1,4-dioxane: Mesitylene = 1: 1                                     | 130       | 3 M           | 893.15                                |
| 20            | 1,4-dioxane: Mesitylene = 1: 1                                     | 140       | 3 M           | 912.58                                |

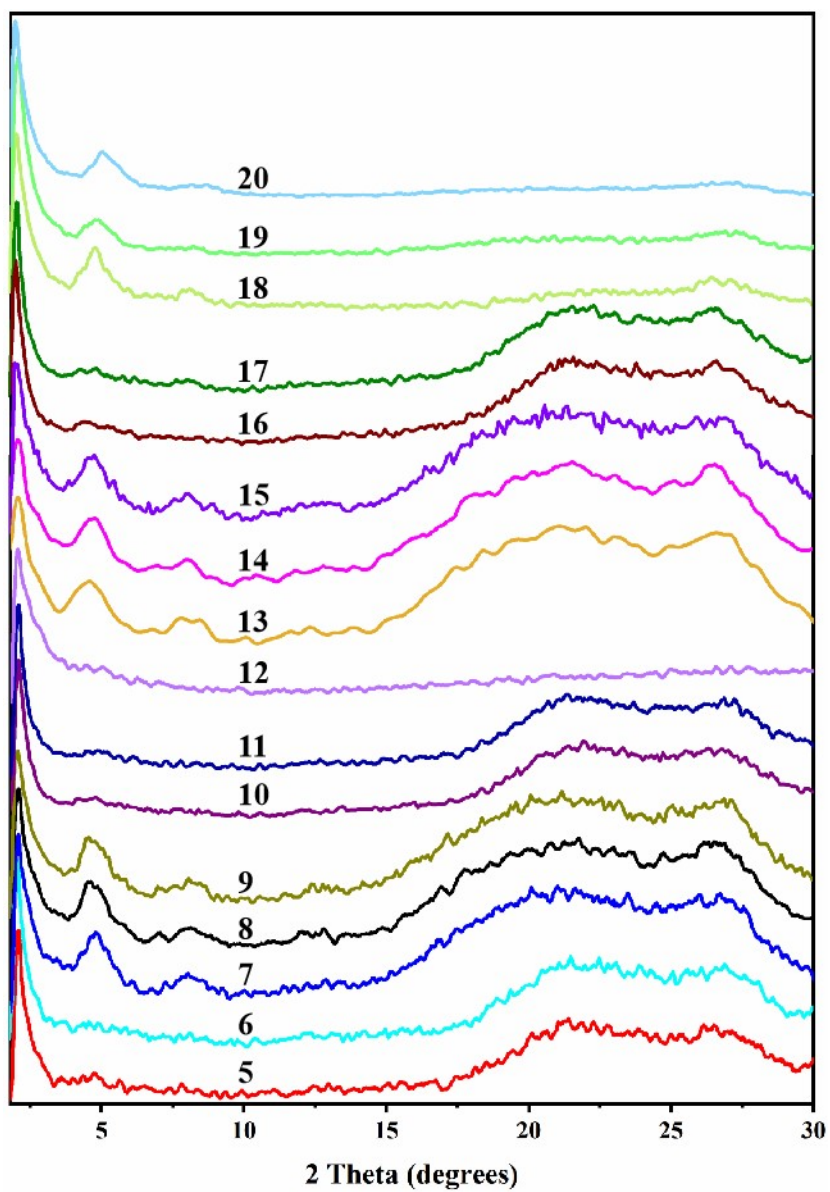

**Figure S10:** PXRD spectra of Tp-BI-COF synthesized with different conditions.

## Section S-7: Gas Adsorption Studies

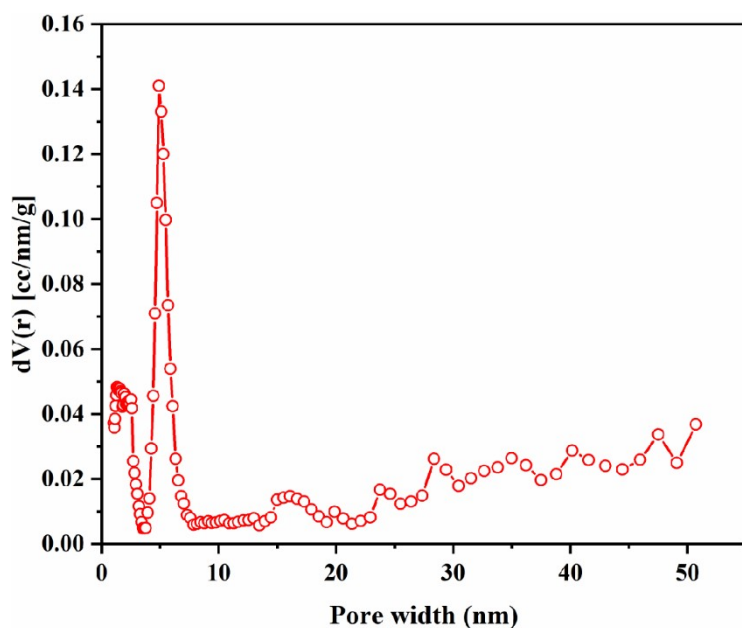

Figure S11: Pore size distribution of Tp-BI-COF, with a pore size of 4.9 nm.

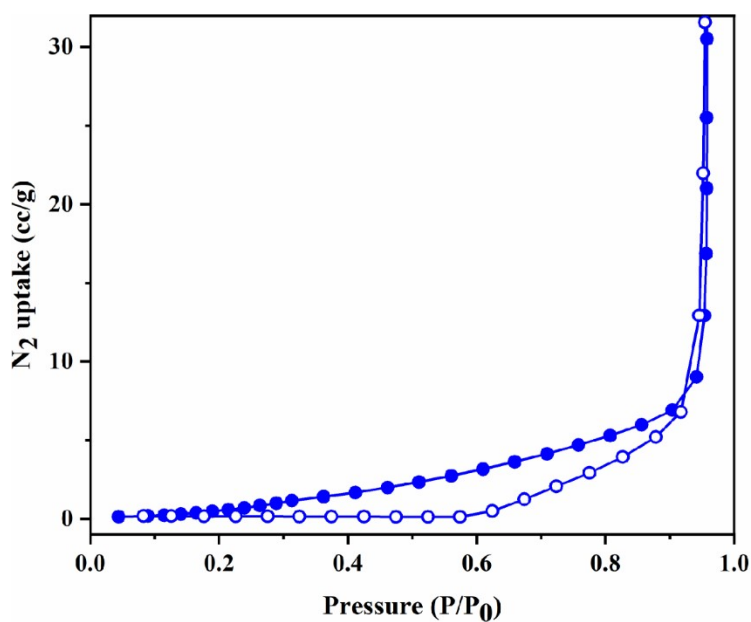

Figure S12:  $N_2$  adsorption isotherm curves (77 K) of  $H_3PO_4@Tp-BI-COF$  (filled: adsorption, open: desorption).

## Section S-8: Photochromic properties of Tp-BI-COF

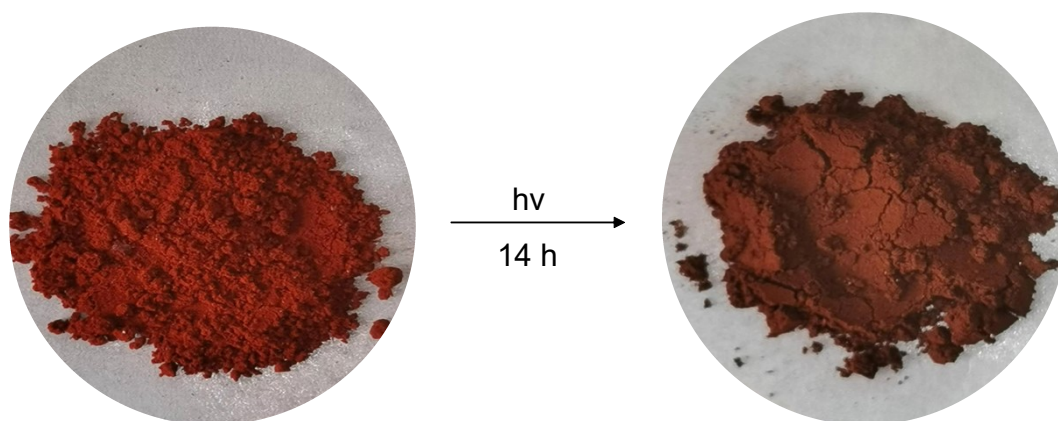

**Figure S13:** The color change photo of **Tp-BI-COF** before and after irradiation.

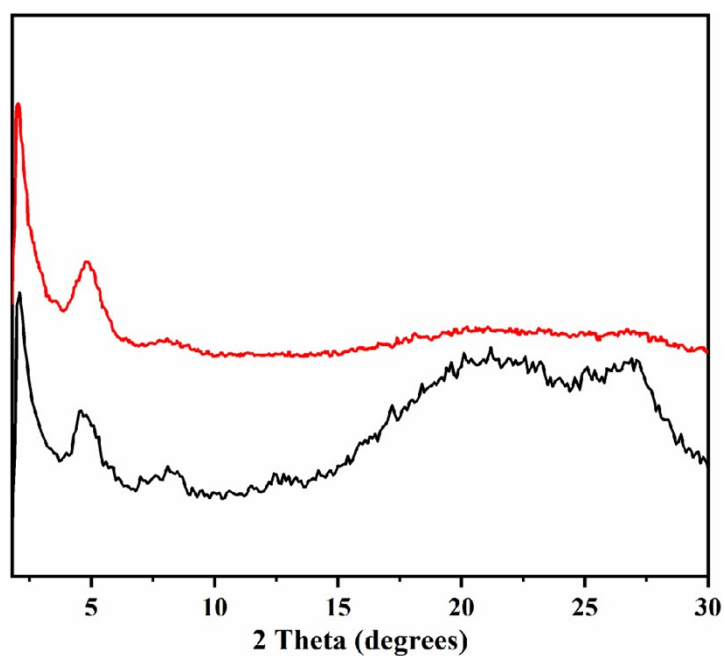

**Figure S14:** PXRD spectra of **Tp-BI-COF** before irradiation (black) and after irradiated for 14 h (red).

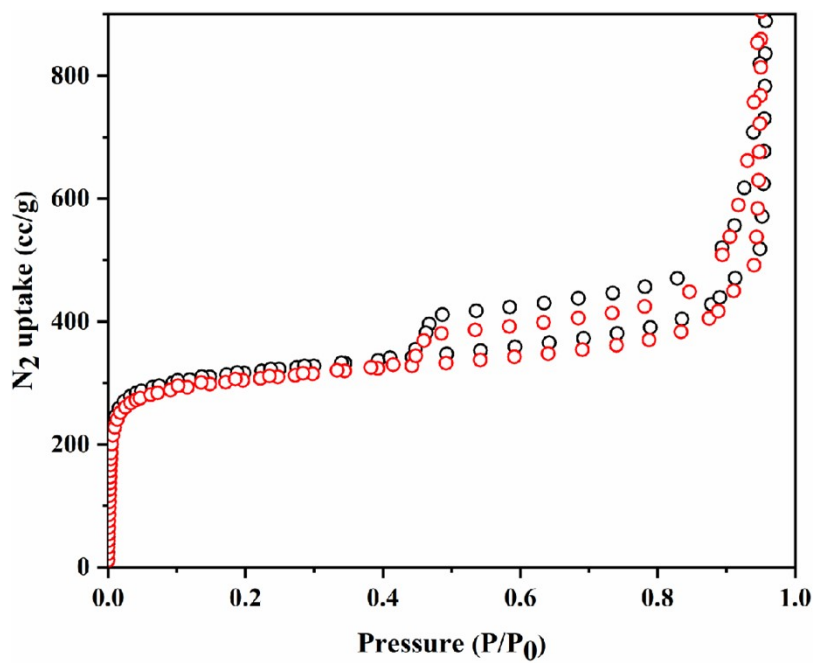

**Figure S15:** Nitrogen sorption isotherm profiles (77 K) of **Tp-BI-COF** before irradiation (black) and after irradiated for 14 h (red).



**Section S-9: Preparation of  $H_3PO_4@Tp-BI-COF$**

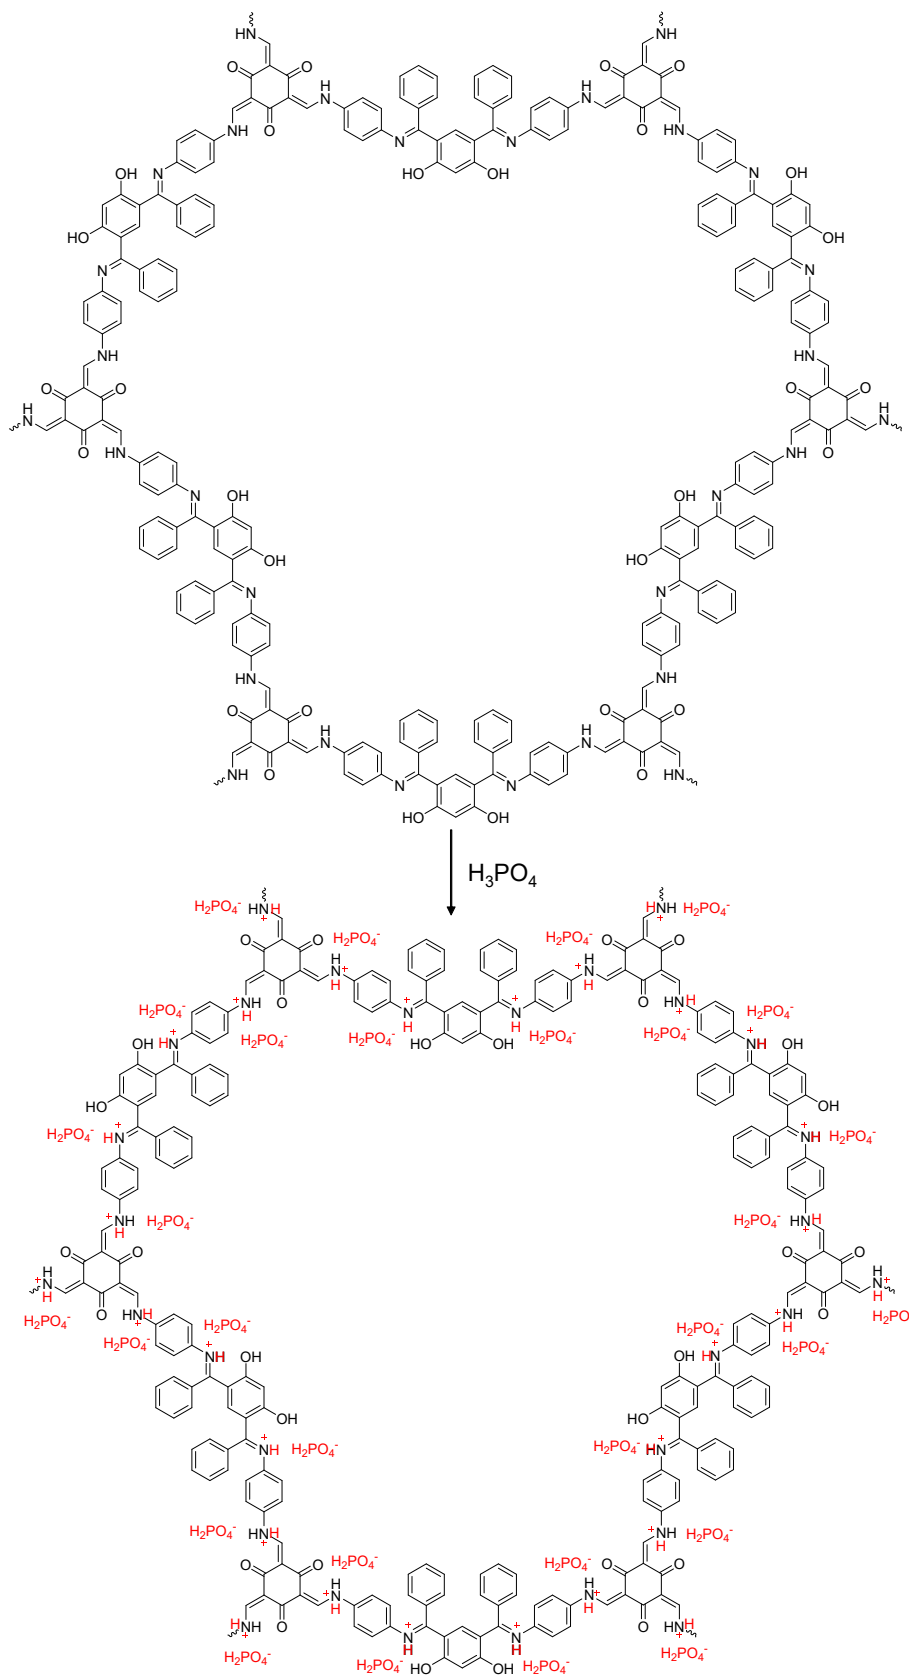

**Figure S16:** Schematic representation of protonation of Tp-BI-COF.

**Section S-10: Stability study of Tp-BI-COF and  $H_3PO_4@Tp-BI-COF$**

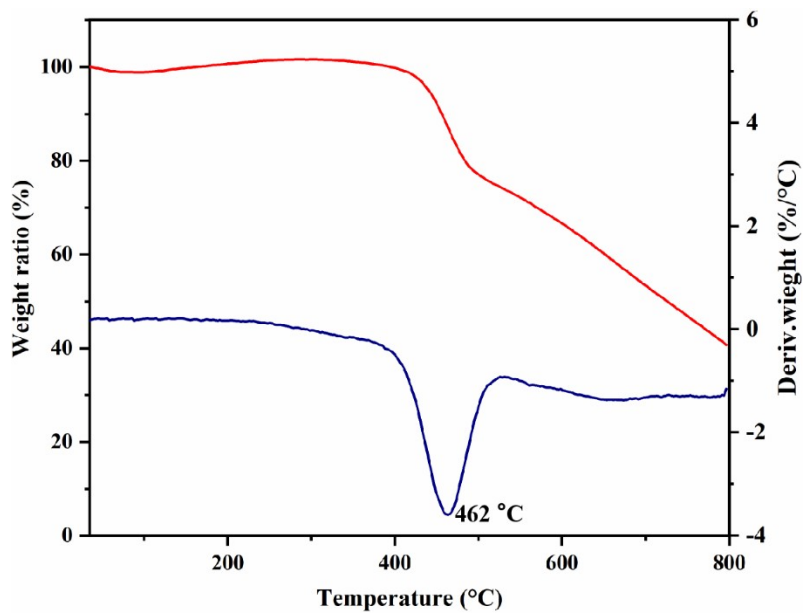

**Figure S17:** TGA data of **Tp-BI-COF** under  $N_2$  atmosphere.

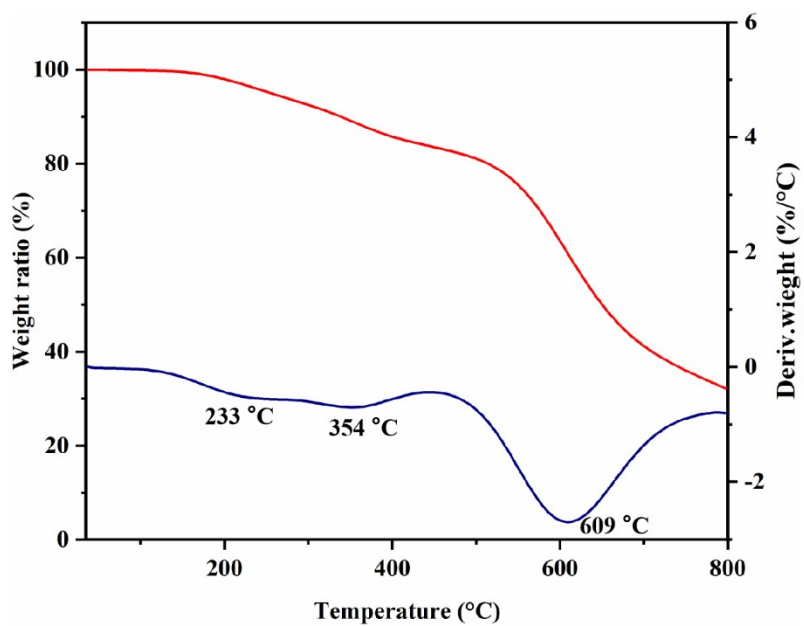

**Figure S18:** TGA data of  **$H_3PO_4@Tp-BI-COF$**  under  $N_2$  atmosphere.

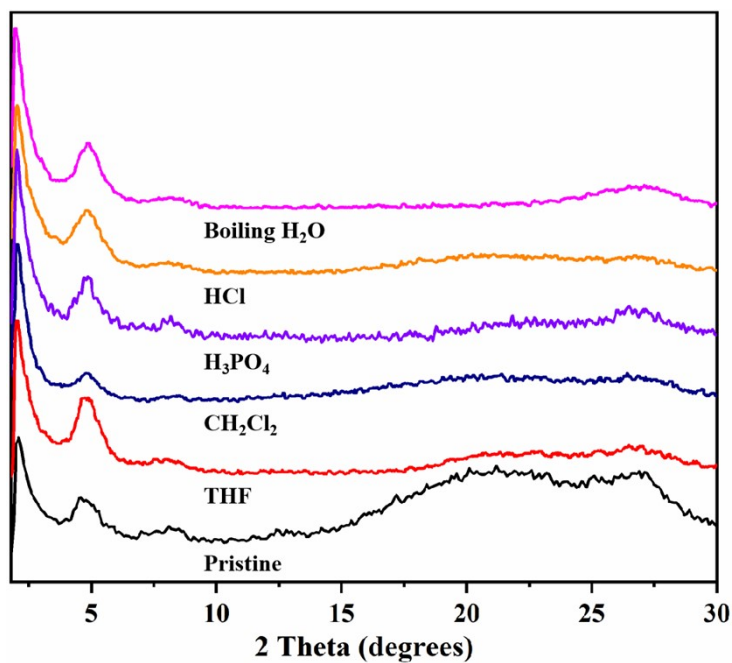

**Figure S19:** PXRD patterns of recovered **Tp-BI-COF** upon washing after immersed in different solvents for 7 days (black, pristine COF; red, THF; blue,  $\text{CH}_2\text{Cl}_2$ ; violet,  $\text{H}_3\text{PO}_4$ ; orange, HCl; pink, boiling water).

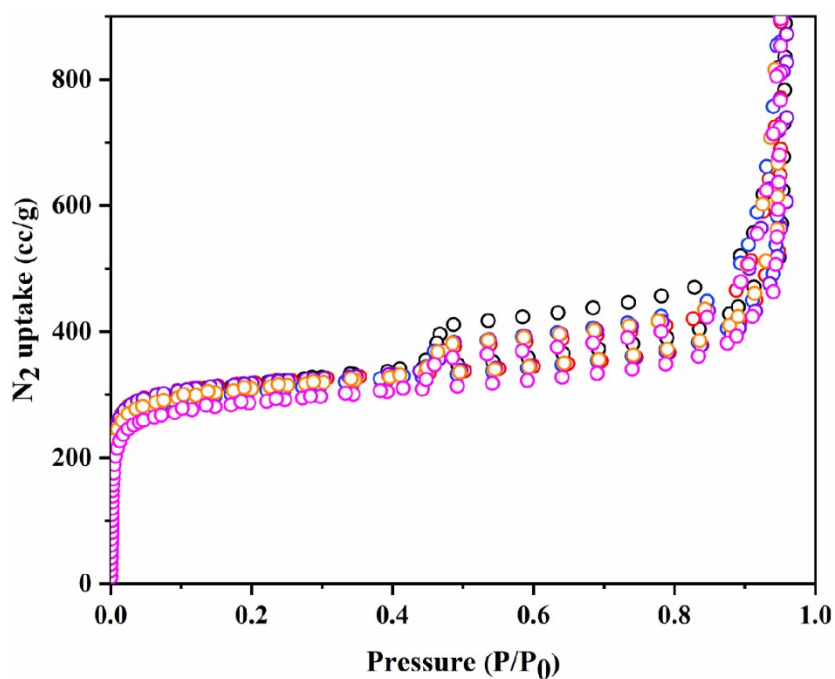

**Figure S20:** Nitrogen sorption isotherm profiles of recovered **Tp-BI-COF** measured at 77 K after treatment in different solvents for 7 days (black, pristine COF; red, THF; blue,  $\text{CH}_2\text{Cl}_2$ ; violet,  $\text{H}_3\text{PO}_4$ ; orange, HCl; pink, boiling water).

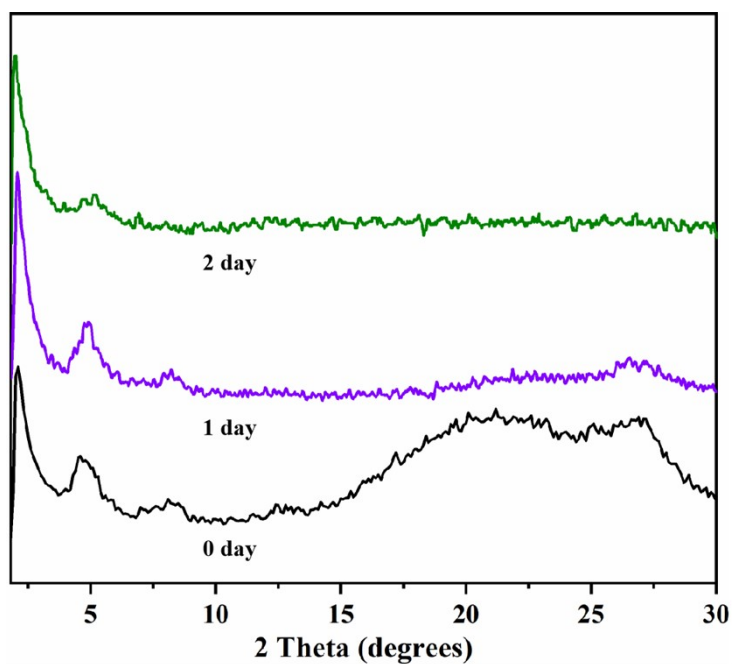

**Figure S21:** PXRD patterns of recovered **Tp-BI-COF** upon washing with H<sub>2</sub>O after immersing in aqueous NaOH (9 M) for different time (black, 0 day; violet, 1 day; green, 2 day).

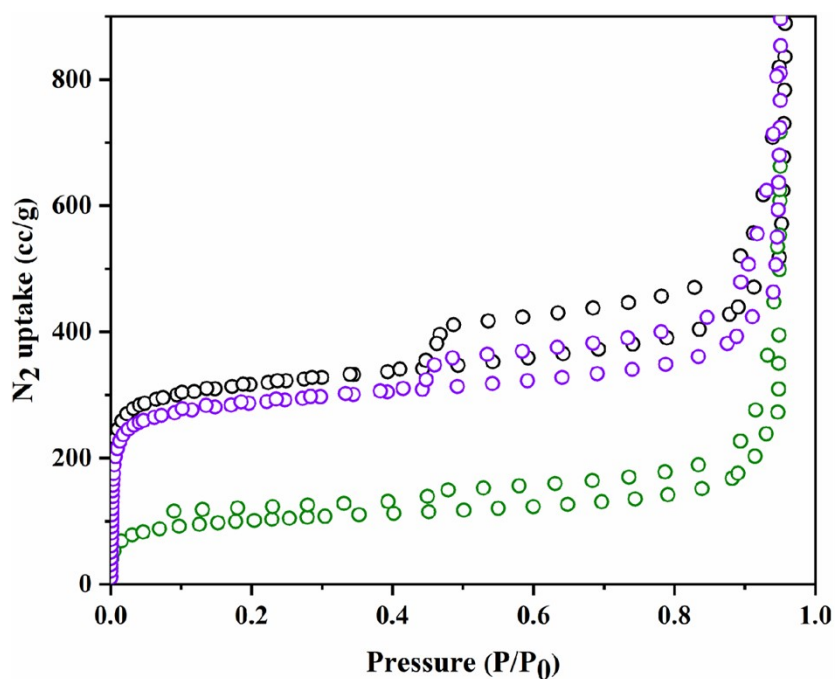

**Figure S22:** Nitrogen sorption isotherm profiles of recovered **Tp-BI-COF** measured at 77 K after treatment in aqueous NaOH (9 M) for different time (black, 0 day; violet, 1 day; green, 2 day).

**Section S-11: PXRD study of Tp-BI-COF and  $H_3PO_4@Tp-BI-COF$**

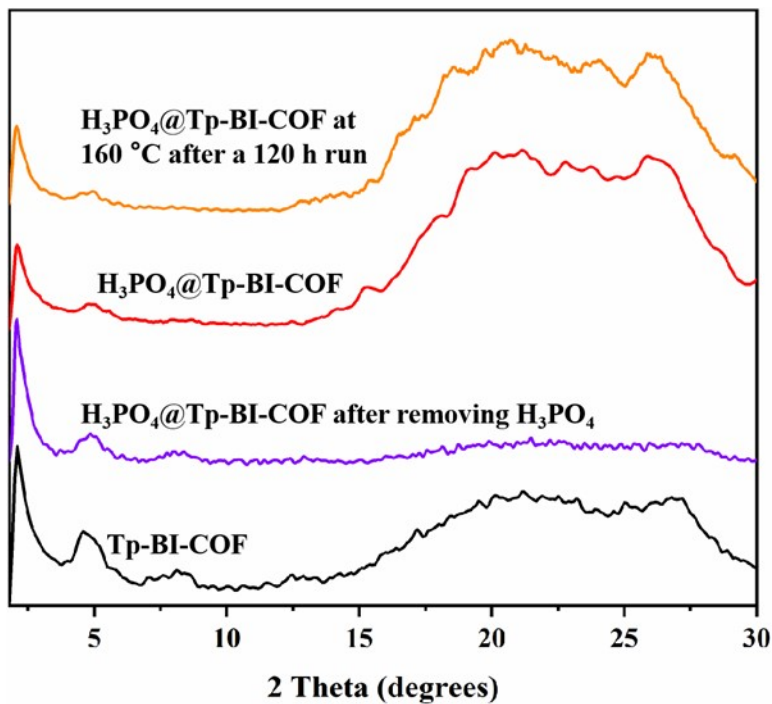

**Figure S23:** PXRD spectra of Tp-BI-COF (black),  $H_3PO_4@Tp-BI-COF$  after removing  $H_3PO_4$  (purple),  $H_3PO_4@Tp-BI-COF$  (red) and  $H_3PO_4@Tp-BI-COF$  after running at 160 °C for 120 h (orange).

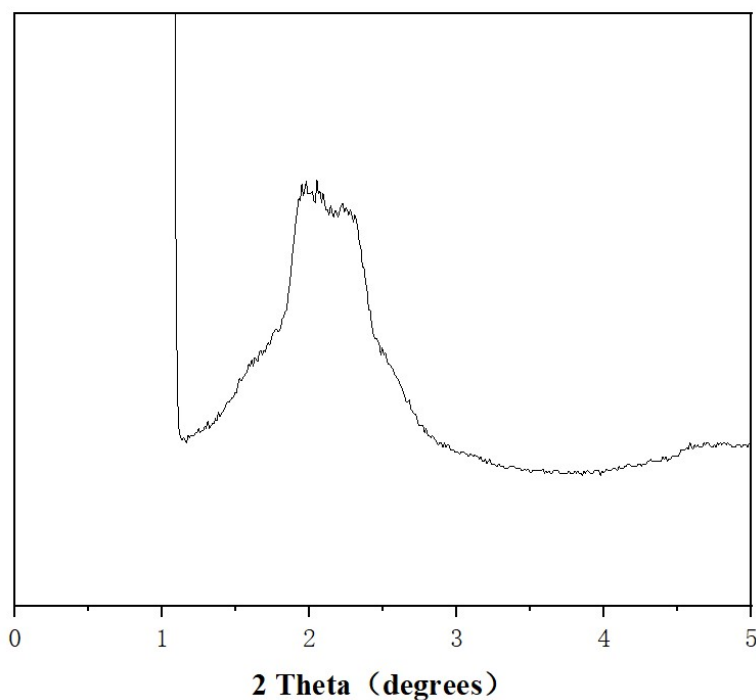

**Figure S24:** SAXS of Tp-BI-COF.

*Section S-12: Energy dispersive X-ray spectroscopy*

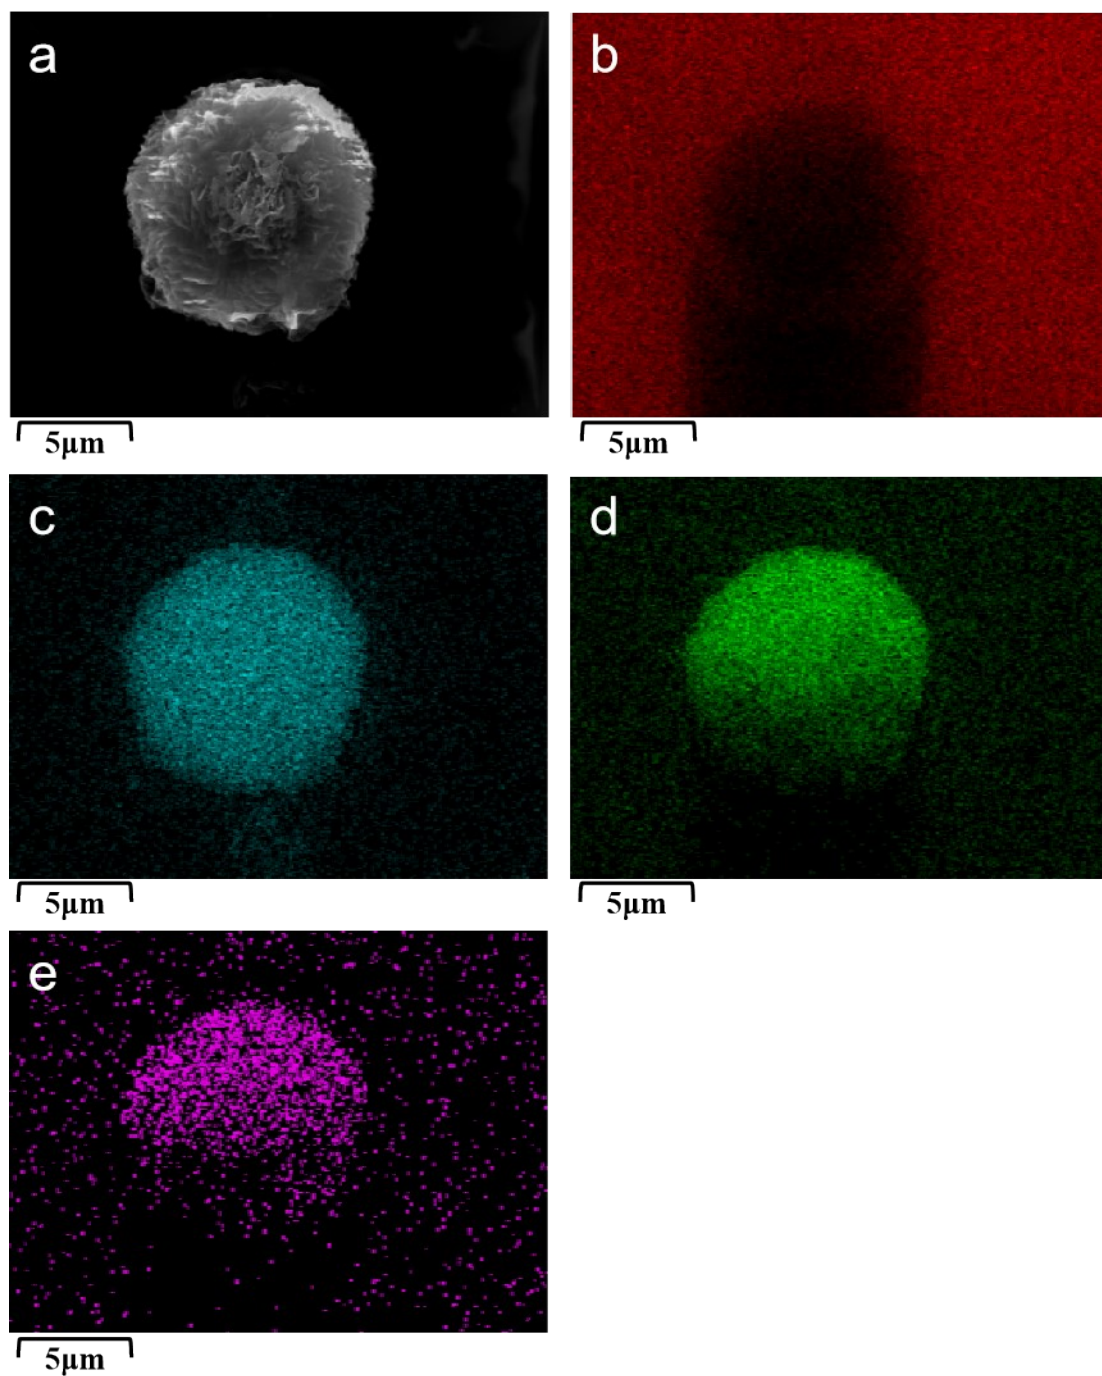

**Figure S25:** Energy dispersive X-ray spectroscopy. (a) SEM image of  $\text{H}_3\text{PO}_4@\text{Tp-BI-COF}$ . (b-e) Elemental distributions of (b) carbon, (c) phosphorus, (d) oxygen, and (e) nitrogen.

**Section S-13: High-resolution XPS spectra**

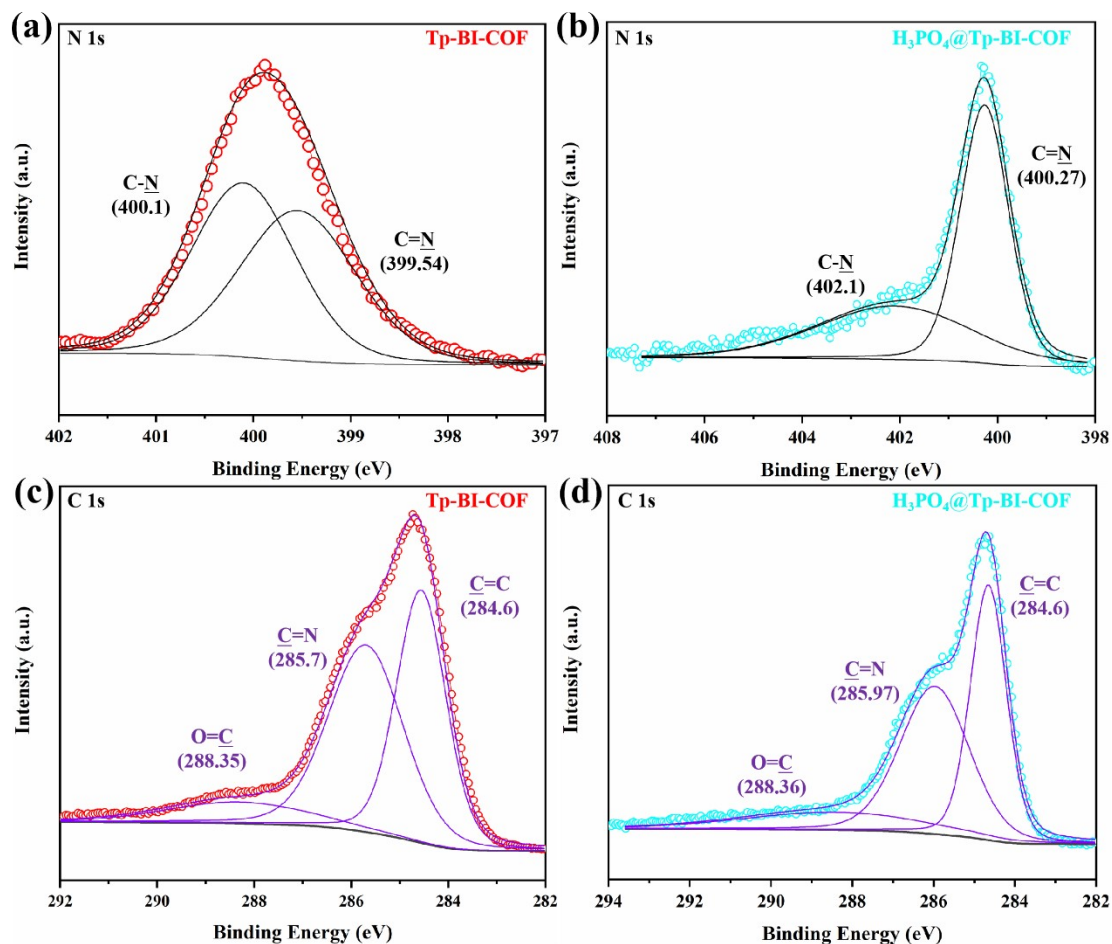

**Figure S26:** High-resolution XPS spectra of the (a) N 1s band of **Tp-BI-COF**, (b) N 1s band of **H<sub>3</sub>PO<sub>4</sub>@Tp-BI-COF**, (c) C 1s band of **Tp-BI-COF**, and (d) C 1s band of **H<sub>3</sub>PO<sub>4</sub>@Tp-BI-COF**.

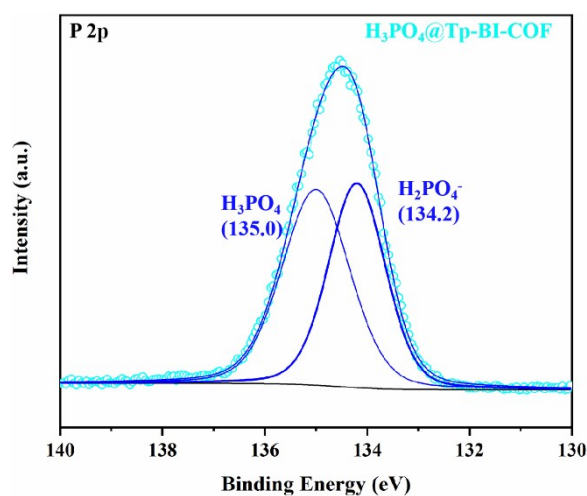

**Figure S27:** High-resolution P 2p XPS spectra of **H<sub>3</sub>PO<sub>4</sub>@Tp-BI-COF**.



**Section S-14: Nyquist plots of  $H_3PO_4@Tp-BI-COF$**

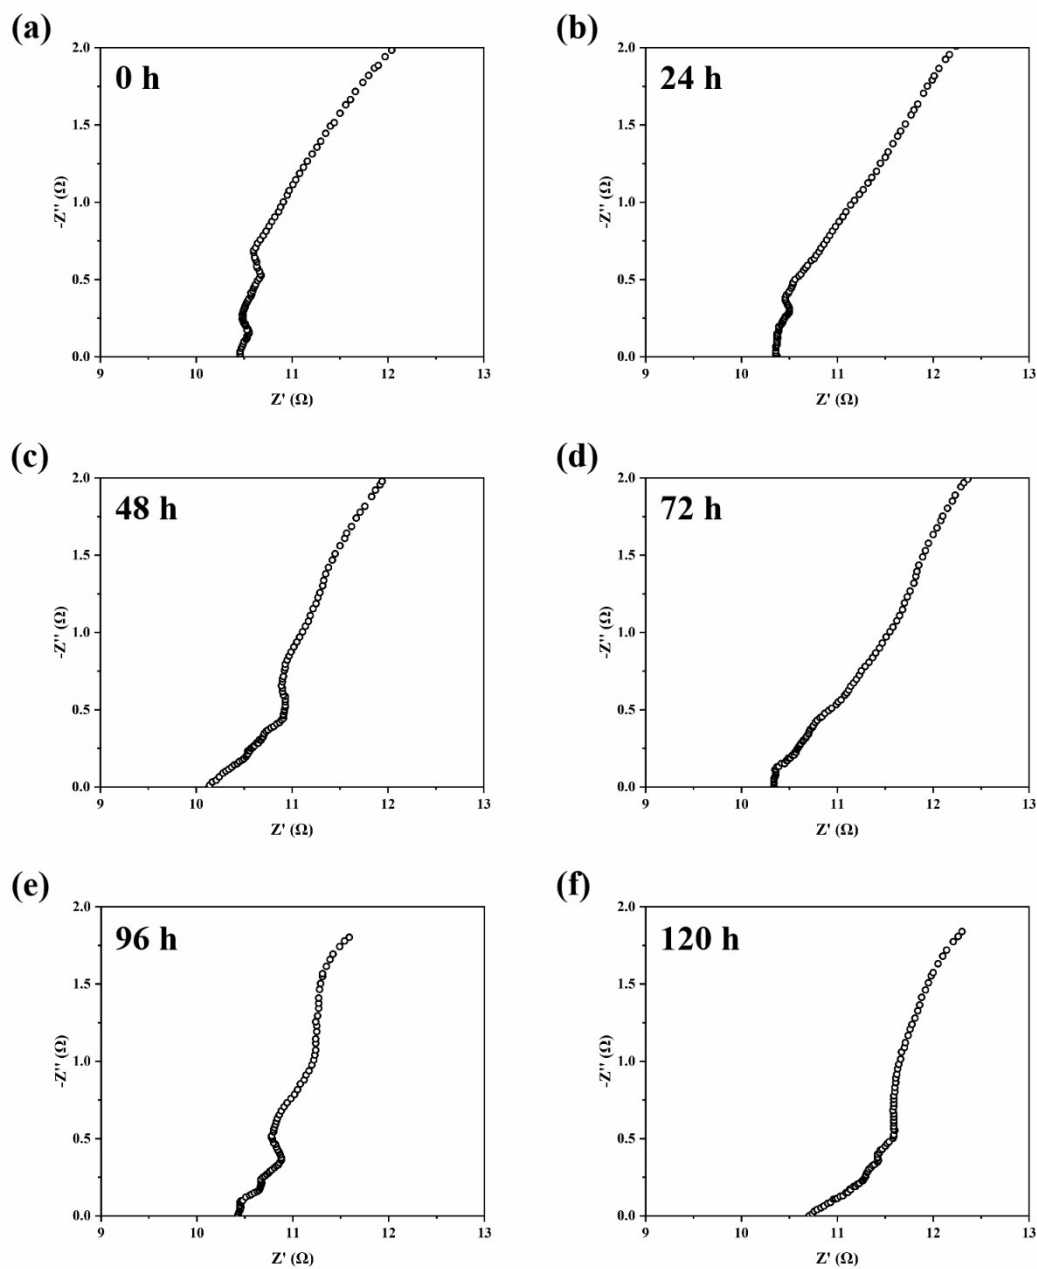

**Figure S28:** Nyquist plots of  $H_3PO_4@Tp-BI-COF$  at 160 °C: (a) 0 hour, (b) 24 hours, (c) 48 hours, (d) 72 hours, (e) 96 hours, and (f) 120 hours. (sample weight: 148 mg; pellet radius: 6.5 mm; pellet thickness: 0.8 mm).



### *Section S-15: Current status of anhydrous proton conductors*

**Table S3.** Summary of the state-of art anhydrous proton conductors based on COFs

| Materials                                  | $\sigma$ (S cm <sup>-1</sup> ) | T (K)         | Ref.               |
|--------------------------------------------|--------------------------------|---------------|--------------------|
| H <sub>3</sub> PO <sub>4</sub> @Tp-BI-COF  | $5.95 \times 10^{-3}$          | 433           | <b>This work</b>   |
| H <sub>3</sub> PO <sub>4</sub> @Tp-Azo-COF | $6.70 \times 10^{-5}$          | 340           | Ref. <sup>5</sup>  |
| H <sub>3</sub> PO <sub>4</sub> @TpBpy-MC   | $2.50 \times 10^{-3}$          | 393           | Ref. <sup>6</sup>  |
| H <sub>3</sub> PO <sub>4</sub> @TpBpy-ST   | $1.98 \times 10^{-3}$          | 393           | Ref. <sup>6</sup>  |
| TpPa-SO <sub>3</sub> H                     | $1.70 \times 10^{-5}$          | 393           | Ref. <sup>7</sup>  |
| Phytic acid@TpPa-(SO <sub>3</sub> H-Py)    | $5.00 \times 10^{-4}$          | 393           | Ref. <sup>7</sup>  |
| aza-COF-2 <sub>H</sub>                     | $4.80 \times 10^{-3}$          | 323 (97% RH)  | Ref. <sup>8</sup>  |
| LiCl@RT-COF-1                              | $6.45 \times 10^{-3}$          | 313 (100% RH) | Ref. <sup>9</sup>  |
| Im@TPB-DMTP-COF                            | $4.37 \times 10^{-3}$          | 403           | Ref. <sup>10</sup> |
| Tri@TPB-DMTP-COF                           | $1.10 \times 10^{-3}$          | 403           | Ref. <sup>10</sup> |
| Im@Td-PPI                                  | $3.49 \times 10^{-4}$          | 363           | Ref. <sup>11</sup> |
| Im@Td-PNDI                                 | $9.04 \times 10^{-5}$          | 363           | Ref. <sup>11</sup> |

### *Section S-16: References*

1. J. H. Chong, M. Sauer, B. O. Patrick and M. J. MacLachlan, *Org. Lett.*, 2003, **5**, 3823.
2. M. Abdul-Aziz, J. V. Auping and M. A. Meador, *J. Org. Chem.*, 1995, **60**, 1303.
3. (a) Y. Zhu, H. Yang, Y. Jin and W. Zhang, *Chem. Mater.*, 2013, **25**, 3718; (b) W. Lu, D. Yuan, D. Zhao, C.I. Schilling, O. Plietzsch, T. Muller, S. Brašć, J. Guenther, J. Blümel, R. Krishna, Z. Li and H.C. Zhou, *Chem. Mater.*, 2010, **22**, 5964; (c) J.X. Jiang, F. Su, A. Trewin, C. D. Wood, N. L. Campbell, H. Niu, C. Dickinson, A. Y. Ganin, M. J. Rosseinsky, Y. Z. Khimiyak and A. I. Cooper, *Angew. Chem. Int. Ed.*, 2007, **46**, 8574.
4. S. Tao, L. Zhai, A. D. D. Wonanke, M. A. Addicoat, Q. Jiang and D. Jiang, *Nat. Commun.*, 2020, **11**, 1981.
5. S. Chandra, T. Kundu, S. Kandambeth, R. Babarao, Y. Marathe, S. M. Kunjir and R. Banerjee, *J Am Chem Soc*, 2014, **136**, 6570.
6. D. B. Shinde, H. B. Aiyappa, M. Bhadra, B. P. Biswal, P. Wadge, S. Kandambeth, B. Garai, T. Kundu, S. Kurungot and R. Banerjee, *Journal of Materials Chemistry A*, 2016, **4**, 2682.
7. S. Chandra, T. Kundu, K. Dey, M. Addicoat, T. Heine and R. Banerjee, *Chemistry of Materials*, 2016, **28**, 1489.
8. Z. Meng, A. Aykanat and K. A. Mirica, *Chemistry of Materials*, 2018, **31**, 819.
9. C. Montoro, D. Rodriguez-San-Miguel, E. Polo, R. Escudero-Cid, M. L. Ruiz-Gonzalez, J. A. R. Navarro, P. Ocon and F. Zamora, *J Am Chem Soc*, 2017, **139**, 10079.
10. H. Xu, S. Tao and D. Jiang, *Nat Mater*, 2016, **15**, 722.
11. Y. Ye, L. Zhang, Q. Peng, G. E. Wang, Y. Shen, Z. Li, L. Wang, X. Ma, Q. H. Chen, Z. Zhang and S. Xiang, *J Am Chem Soc*, 2015, **137**, 913.
